# Supplementary material for: The Lack of STING Impairs the MHC-I Dependent Antigen Presentation and JAK/STAT Signaling in Murine Macrophages
Source: MDPI journal article supplement (doi:10.3390/ijms232214232), 2022-11-17
Supplement: s1 [file s1]

# **The lack of STING impairs the MHC-I dependent antigen presentation and JAK/STAT signaling in murine macrophages**

Carmen Caiazza <sup>1</sup>, Teresa Brusco <sup>1</sup>, Federica D'Alessio <sup>1</sup>, Massimo D'Agostino <sup>1</sup>, Angelica Avagliano <sup>2</sup>, Alessandro Arcucci <sup>2</sup>, Concetta Ambrosino <sup>3,4,5</sup>, Giuseppe Fiume <sup>6,\*†</sup> and Massimo Mallardo <sup>1,\*†</sup>

<sup>1</sup> Department of Molecular Medicine and Medical Biotechnology, University of Naples "Federico II", Via S. Pansini 5, 80131 Naples, Italy

<sup>2</sup> Department of Public Health, University of Naples "Federico II", Via S. Pansini 5, 80131 Naples, Italy

<sup>3</sup> Department of Science and Technology, University of Sannio, Via De Sanctis, 82100 Benevento, Italy

<sup>4</sup> IRGS, Biogem-Scarl, Via Camporeale, Ariano Irpino, 83031 Avellino, Italy

<sup>5</sup> IEOS-CNR, Via Pansini 6, 80131 Naples, Italy

<sup>6</sup> Department of Experimental and Clinical Medicine, University of Catanzaro "Magna Graecia", 88100 Catanzaro, Italy

\* Correspondence: fiume@unicz.it (G.F.); massimo.mallardo@unina.it (M.M.)

† These authors share last authorship.

## Supplementary Figures

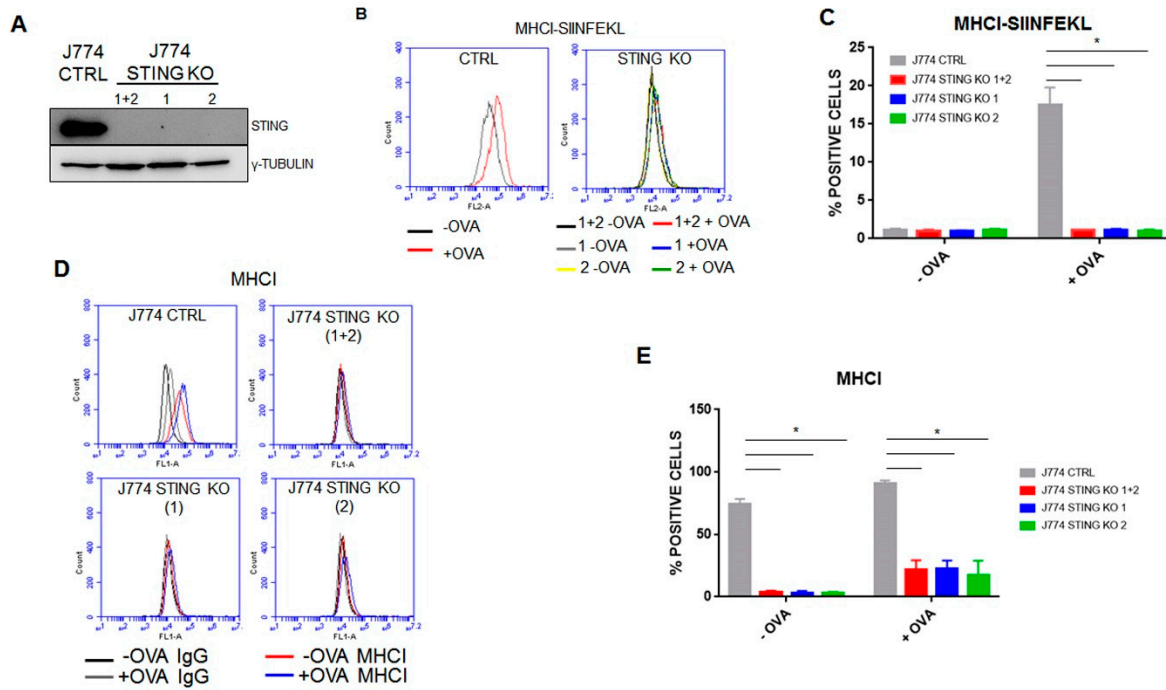

**Figure S1. Efficiency of single RNA guides in silencing STING expression and in reducing the amount of MHC-I and MHC-I-SIINFEKL complex, upon OVA treatment.** (A) J774 cells ( $5 \times 10^6$ ) were infected with scrambled vector, gRNA1, gRNA2 or gRNA1+2. Whole cell extracts ( $30 \mu\text{g}$ ) were analyzed by western blot using the indicated antibodies. (B) J774 CTRL, STING KO 1, STING KO 2 and STING KO 1+2 ( $1 \times 10^6$ ) were treated with  $500 \mu\text{g/ml}$  of OVA for 24h and were stained with SIINFEKL/H-2Kb-PE and IgG-PE, as control. Each plot represents 10000 events of a representative experiment. (C) Percentage of SIINFEKL/H-2Kb positive population in untreated or OVA treated cells. Values (mean  $\pm$  SE,  $n = 3$ ) are shown. The asterisks indicate a statistically significant difference compared to untreated control, according to Student's t-test ( $p < 0.01$ ). (D) J774 CTRL, STING KO 1, 2 and 1+2 cells ( $1 \times 10^6$ ) were treated with  $500 \mu\text{g/ml}$  of OVA for 24h and stained with MHC-I-FITC and IgG-FITC as control. Each plot represents 10000 events of a representative experiment. (E) Percentage of MHC-I positive population in untreated or OVA treated cells. Values

(mean  $\pm$  SE, n = 3) are shown. The asterisks indicate a statistically significant difference compared to untreated control, according to Student's t-test ( $p < 0.01$ ).

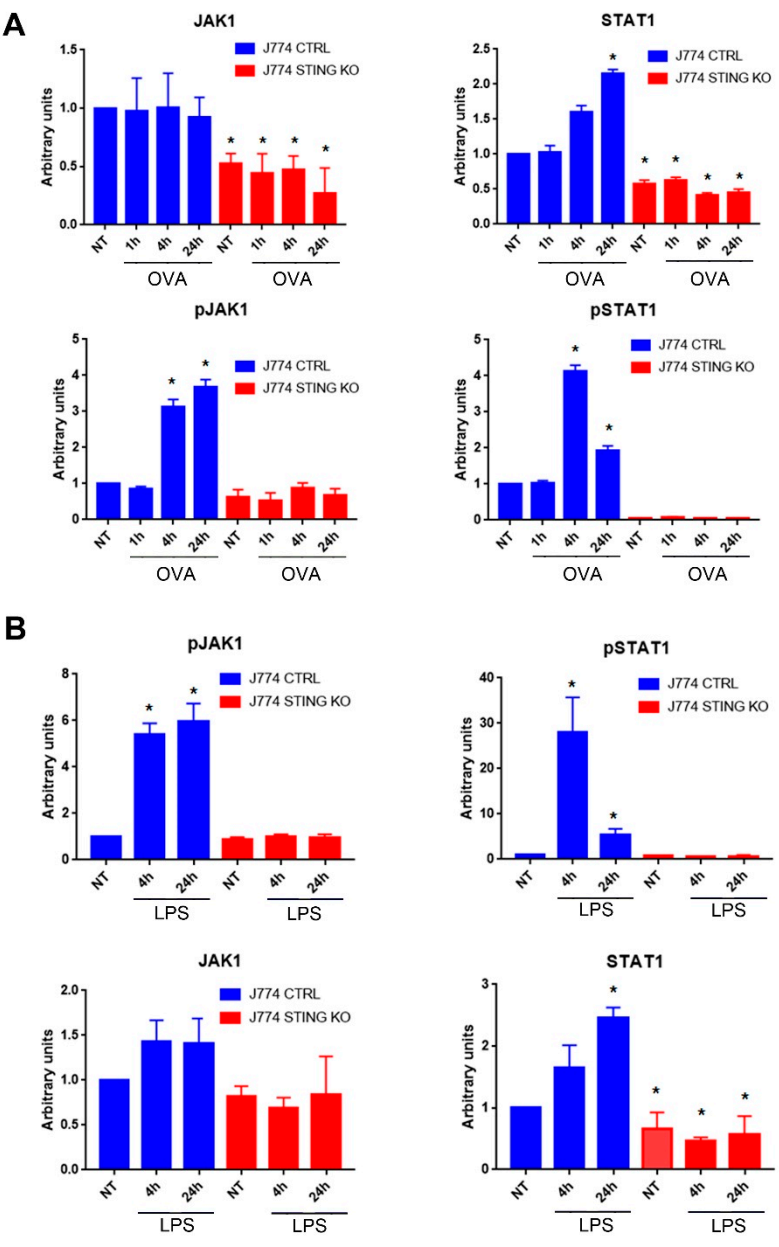

**Figure S2. Quantifications of the protein levels shown in Figure 6.** (A) Densitometry of the protein bands shown in Figure 6A. (B) Densitometry of the protein bands shown in Figure 6C.

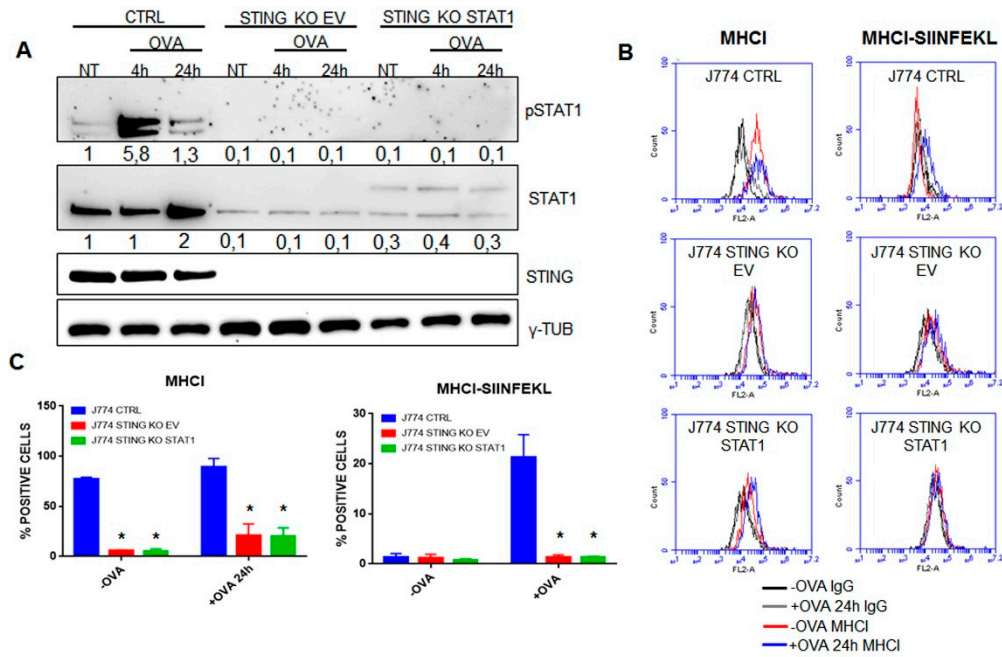

**Figure S3. Overexpression of STAT1 does not rescue the MHCI levels and the antigen presentation rate in STING KO macrophages.** (A) J774 CTRL, STING KO EV and STING KO STAT1 cells ( $5 \times 10^6$ ) were treated with 500  $\mu\text{g}/\text{ml}$  of OVA or left untreated for the indicated time. Whole cell extracts (30  $\mu\text{g}$ ) were analyzed by western blot using the indicated antibodies.  $\gamma$ -Tubulin was included as control of protein loading. Mean values of the densitometry of bands are indicated. (B) J774 CTRL, STING KO EV and STAT1 ( $1 \times 10^6$ ) were treated with 500  $\mu\text{g}/\text{ml}$  of OVA for 24h or left untreated and stained with MHC-I-PE (left panels) and SIINFEKL/H-2Kb-PE (right panel) and IgG-PE as control. Each plot represents 10000 events of a representative experiment. (C) Percentage of MHCI (left panel) and SIINFEKL/H-2Kb (right panel) positive population in untreated or OVA treated cells. Values (mean  $\pm$  SE,  $n = 3$ ) are shown. The asterisks indicate a statistically significant difference compared to untreated control, according to Student's  $t$ -test ( $p \leq 0.01$ ).

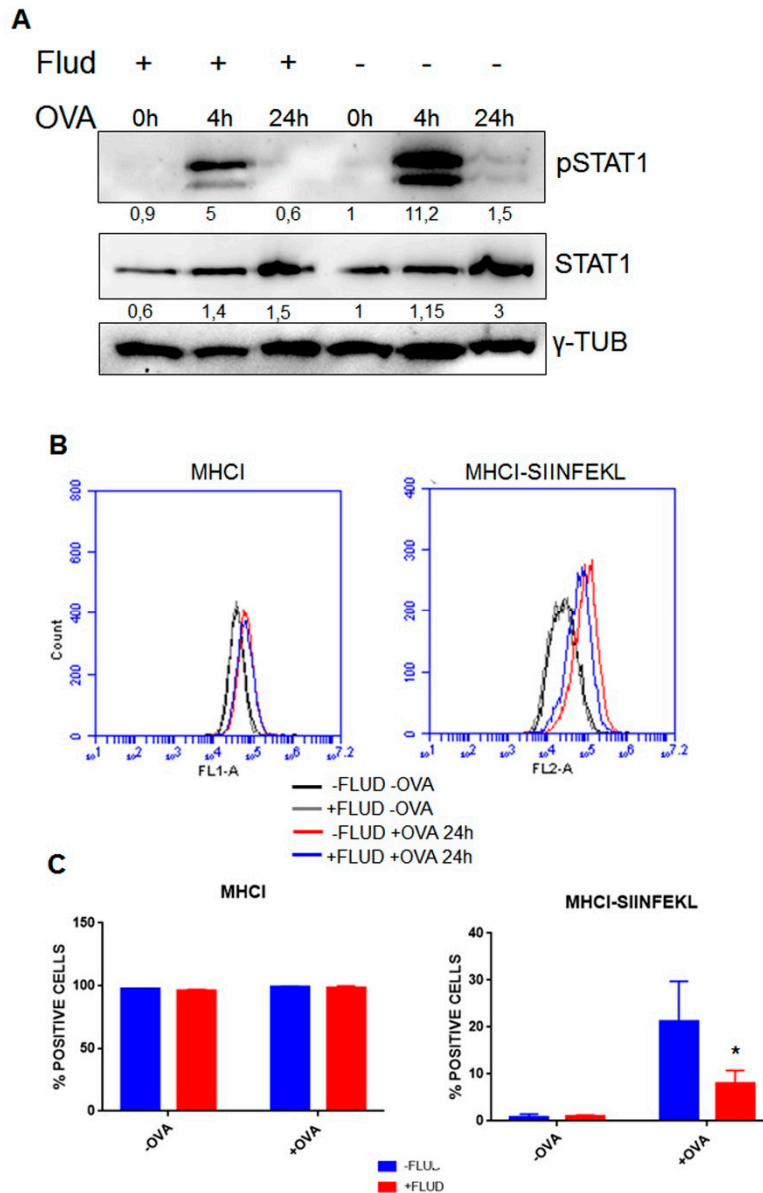

**Figure S4. Fludarabine treatment reduce the rate of antigen presentation by reducing *STAT1* activation.** (A) J774 CTRL ( $5 \times 10^6$ ) were treated with 500  $\mu\text{g}/\text{ml}$  of OVA or left untreated for the indicated time, in presence or absence of Fludarabine, as indicated. 30  $\mu\text{g}$  of whole cell extracts were analyzed by western blot for the indicated proteins.  $\gamma$ -Tubulin was included as control of protein loading. Mean values of the densitometry of bands are indicated. (B) J774 CTRL mock and fludarabine treated ( $1 \times 10^6$ ) were incubated with 500  $\mu\text{g}/\text{ml}$  of OVA for 24h and stained with MHC-I-FITC, SIINFEKL/H-2Kb-PE and IgGs (FITC and PE) as controls. Each plot represents 10000 events of a representative experiment. (C) Percentage of MHC-I (left panel) and MHC-

I-SIINFEKL (right panel) positive population in untreated or OVA treated cells in presence or absence of Fludarabine, as indicated. Values (mean  $\pm$  SE, n = 3) are shown. The asterisk indicates a statistically significant difference compared to untreated control, according to Student's *t*-test ( $p \leq 0.01$ ).
